# Supplementary material for: Non-linear magnetic behavior around zero field of an assembly of superparamagnetic nanoparticles
Source: Royal Society of Chemistry journal article supplement (doi:10.1039/c2an16060a), 2012-01-01
Supplement: c2an16060a.pdf [file c2an16060a.pdf]

## Supporting information

# Non linear magnetic behaviour around zero field of an assembly of superparamagnetic nanoparticles

Caroline de Montferrand<sup>1, 4</sup>, Yoann Lalatonne<sup>1, 2</sup>, Dominique Bonnin<sup>3</sup>, Laurence Motte<sup>1\*</sup>,  
Philippe Monod<sup>3</sup>

- 1- CSPBAT laboratory, UMR 7244 CNRS, University of Paris 13, France,
- 2- Service Médecine Nucléaire, Hôpital Avicenne, Bobigny, France
- 3- LPEM, UPR 5 CNRS, ESPCI ParisTech, France
- 4- Magnisense France, Paris, France

\*Corresponding author

E-mail: [laurence.motte@univ-paris13.fr](mailto:laurence.motte@univ-paris13.fr), [laurence.motte-torcheux@univ-paris13.fr](mailto:laurence.motte-torcheux@univ-paris13.fr)

Telephone: ++33(0)148387707; Fax: ++33(0)148388528

## Multiparametric Testing

In an attempt for multiparametric feasibility, two SPM probes : lab-made  $\gamma\text{-Fe}_2\text{O}_3$  nanoparticles and commercial Estapor beads (1020/50, Merck), are mixed at different ratios. The iron concentration of the two ferrofluids was adjusted in order to obtain MIAplex® signatures at iso-intensity. Fig. S1A shows the MIAplex® signatures of the two kinds of particles.

Fig. S1B-D shows the experimental MIAplex® signatures measured by mixing the two kinds of particles in various proportions and the corresponding calculated curves. A rather good agreement is obtained between experimental and calculated curves. This confirms the high sensitivity of measuring  $d^2B(H)/dH^2$  for characterization and separation purpose.

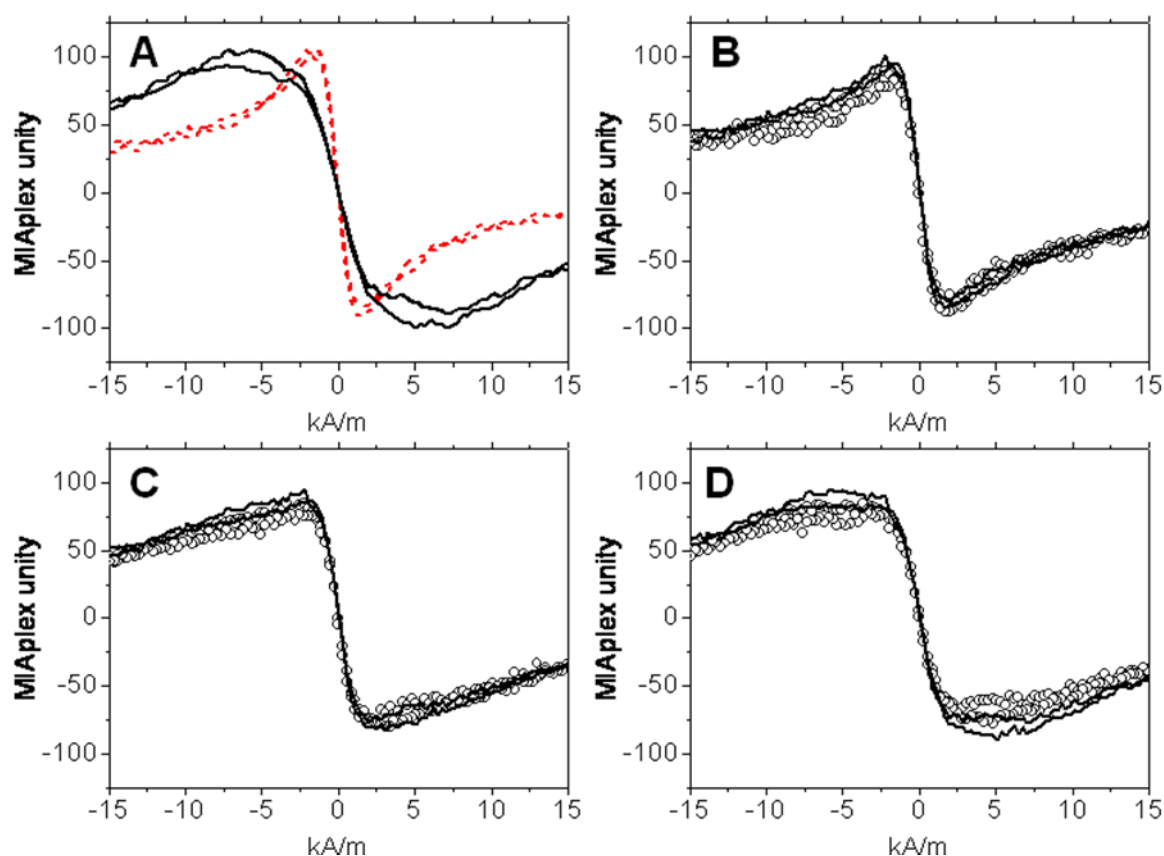

**Figure S1: A :** MIAplex® signature for nanoparticles (dashed line) and Estapor beads (solid line). **Experimental (open circles) and calculated (solid line) curves for 75%-25% (B), 50%-50% (C), and 25%-75% (D) nanoparticles-Estapor mixtures.**

## Synthesis and characterization of $\gamma\text{Fe}_2\text{O}_3$ nanoparticles

Sodium n-dodecyl sulfate (99%, Alfa Aesar), dimethylamine solution (40%, Fluka), Iron (II) Chloride Tetrahydrate (Sigma Aldrich) were used as received. Water is purified with a Millipore system (resistivity 18.2 M $\Omega$ .cm).

Concerning lab-made nanoparticles, they are synthesized according to a procedure already described. Briefly, non coated  $\gamma\text{Fe}_2\text{O}_3$  particles were synthesized by reaction of ferrous dodecyl sulfate with dimethylamine in water for two hours at 28°C<sup>1</sup>. The nanocrystal surface is then functionalized with 5-

hydroxy-5,5-bis(phosphono)pentanoic acid, which allows a good dispersion in water of the nanoparticles. The nanoparticles surface is characterized via infrared spectroscopy (Fig. S1).

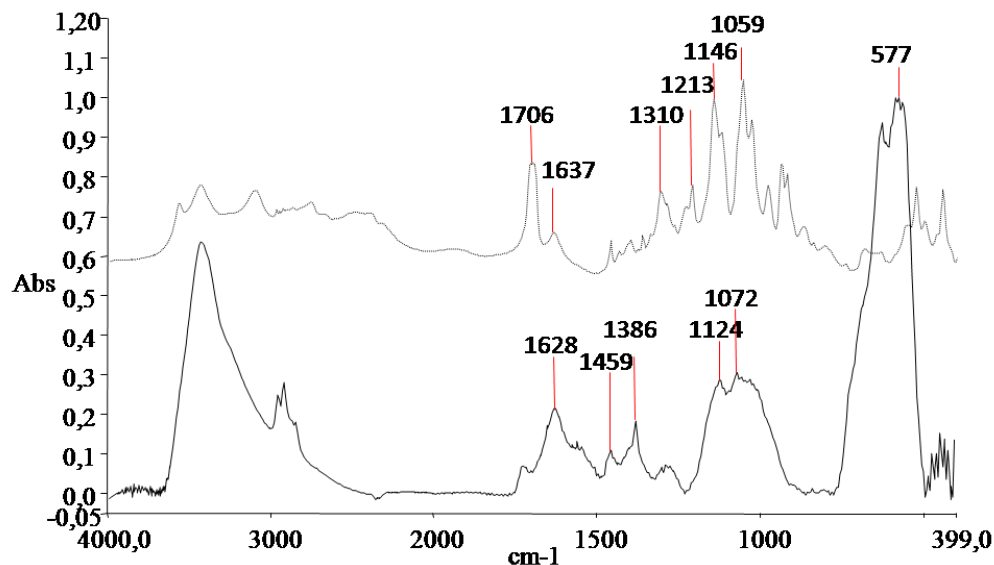

**Figure S2: Infrared spectra of free 5-hydroxy-5,5-bis(phosphono)pentanoic acid (HMBP) (dotted line) and 10nm  $\gamma$ -Fe<sub>2</sub>O<sub>3</sub>@HMBP nanoparticles (solid line).**

The spectrum of free HMBP molecule contains peaks at 1706cm<sup>-1</sup> (C=O), 1637cm<sup>-1</sup> (carboxylic C-O), 1309 and 1213cm<sup>-1</sup> ( $\delta$ CH<sub>2</sub>), 1146 and 1059cm<sup>-1</sup> (P-O). The spectrum of coated nanoparticles presents a very intense band at 577cm<sup>-1</sup> attributed to Fe and a large intense vibration band between 1150 and 950cm<sup>-1</sup> which corresponds to the P-O absorption band. Compared to free molecule, this modified band indicates that the molecule is bonded at the surface of the particle via the hydroxymethylene-bisphosphonate terminal function. The coating rate has been quantified via the P-O area band<sup>1</sup> and is evaluated as about 1500 HMBP molecules per nanoparticle.

Nanoparticles crystal size and structure were characterized by X-ray diffraction (XRD) and Transmission Electron Microscope (TEM). XRD pattern (Fig. S2 and S3) was measured with an X-ray powder diffractometer model X'Pert PRO, MPD, PANalytical, Almelo, the Netherlands, CoK $\alpha$  beam in Bragg Brentano geometry (y/y) was used combined with a fast detector based on real time multiple strip technology (X'Celerator). Crystal XRD size was determined with the Scherrer formula. TEM images were obtained using a FEI CM10 Microscope and samples were prepared by depositing a drop of nanoparticles suspension on carbon coated copper grids placed on a filter paper.

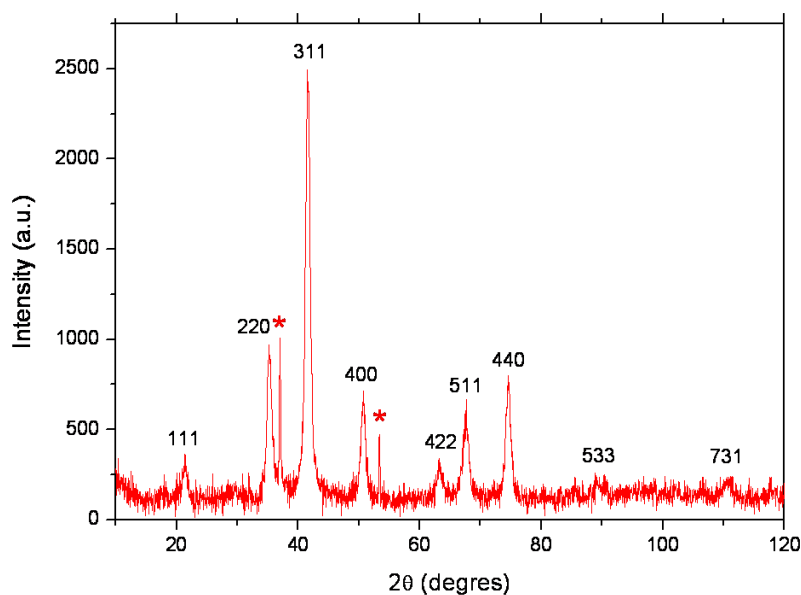

**Figure S3: XRD pattern 10nm  $\gamma\text{Fe}_2\text{O}_3$ @HMBP nanoparticles.**

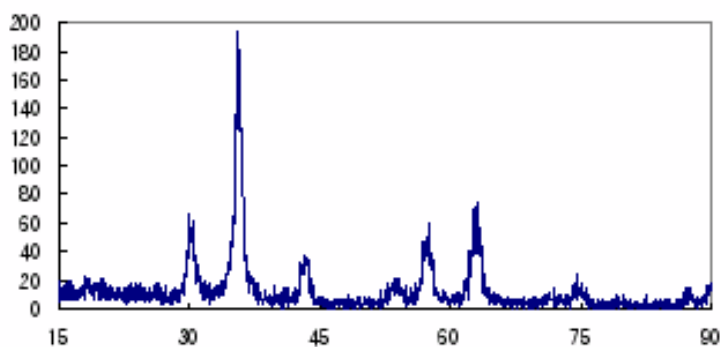

**Figure S4: XRD pattern of Ferrotec Nanoparticles**

The stars Figure S3 indicate the presence of NaCl residue. Phases identified are maghemite  $\gamma\text{Fe}_2\text{O}_3$  and magnetite  $\text{Fe}_3\text{O}_4$  (EVA software (version 13, Bruker-AXS, Karlsruhe, Germany, 1996–2007) and JCPDS-International Centre for Diffraction Data Powder Diffraction File (PDF-2, JCPDS-ICDD, Newtown Square, PA)). Crystal size is determined via the Scherrer equation and is 9.9nm.

The median diameter  $d_0$  and standard deviation  $w$  are deduced from TEM data measurements, simulating the diameter  $d$  distribution with a lognormal function  $g(d)$  described in equation (1).

$$g(d) = \frac{1}{\sigma d \sqrt{2\pi}} \exp\left(-\frac{\left(\ln \frac{d}{d_0}\right)^2}{2\sigma^2}\right) \quad (1)$$

The parameter  $\sigma$  is related to the standard deviation  $w$  by the relation (2).

$$\sigma = \sqrt{\ln\left(1 + \left(\sqrt{1 + 4\left(\frac{w}{d_{med}}\right)^2} - \frac{1}{2}\right)\right)} \approx \sqrt{\ln\left(1 + \left(\frac{w}{d_{med}}\right)^2\right)} \quad (2)$$

## Magnetic properties of $\gamma\text{Fe}_2\text{O}_3$ nanoparticles

Magnetic properties were measured using a superconducting quantum interference device (Quantum Design SQUID Magnetometer MPMS-5T) at 300 K and the MIAplex® technology. Samples measured with SQUID are liquid suspensions in water, 0.5wt%, conditioned in silicone capsules supplied by Plastem S.A. Concerning the MIAplex®, samples are also liquid suspensions in water 0.5wt% and 2wt%, conditioned in 500 $\mu\text{L}$  Eppendorf.

The saturation magnetization is obtained by the extrapolation of the plot of magnetization vs the inverse of the field at the origin<sup>2</sup> (Fig. S4).

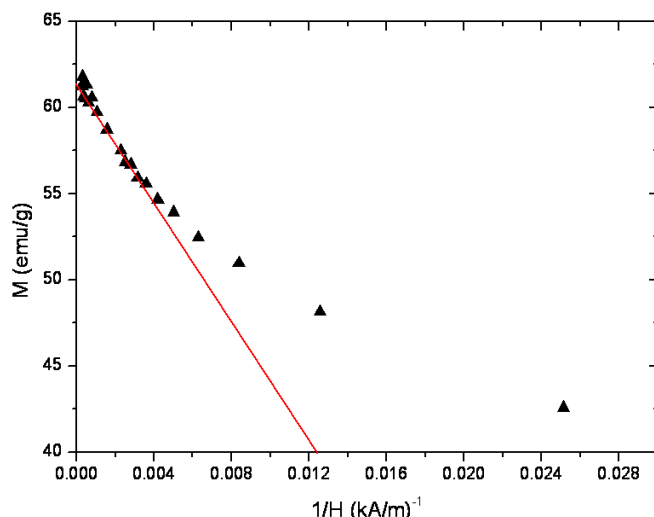

**Figure S5: Magnetization  $M$  as function of  $1/H$ .**

The red line is the asymptote when  $1/H$  tends to zero. The intersection between this asymptote and y-axis is the experimental saturation magnetization  $M_{\text{sat}}$ .

Considering a core-shell system, the spin canting thickness  $e$  and the corresponding magnetic size ( $d_0 - 2e$ ) are deduced from the equation (2)<sup>3</sup>.

$$M_{\text{sat}} = M_{\text{satbulk}} \times \left( \frac{d_0 - 2e}{d_0} \right)^3 \quad (2)$$

For the lab-made nanoparticles with  $d_0 = 10.5\text{nm}$  as TEM diameter and  $M_{\text{sat}} = 61\text{emu/g}$ , we calculate a magnetic size of  $d_m = 9.6\text{nm}$ , corresponding to a non magnetic layer of  $e \approx 0.45\text{nm}$ . We estimate the contribution of the shell in the total volume of the particles from the equation (3).

$$\%(V_{\text{shell}}) = 100 \times \frac{V_{\text{shell}}}{V_{\text{crystalline}}} = 100 \times \frac{V_{\text{crystalline}} - V_{\text{magnetic}}}{V_{\text{crystalline}}} = 100 \times \frac{d_0^3 - d_m^3}{d_0^3} \quad (3)$$

We so obtained a shell contribution of 24% of the particle volume.

The Langevin model of superparamagnetism<sup>4</sup> can be used to describe the non-linear magnetization curve of the nanoparticles, assuming that particles do not interact, by the equation (4).

$$\frac{M}{M_{\text{sat}}} = \coth\left(\frac{v\rho M_{\text{sat}}\mu_0 H}{k_b T}\right) - \frac{k_b T}{v\rho M_{\text{sat}}\mu_0 H} \quad (4)$$

$v$  is the volume of the magnetic core,  $\rho$  is the particle density ( $4900\text{kg}\cdot\text{m}^{-3}$  for maghemite),  $M_{\text{sat}}$  ( $\text{emu}\cdot\text{g}^{-1}$ ) is the saturation magnetization of the particle,  $T$  is the sample temperature in Kelvin (taken to be 300 K),  $\mu_0$  is the permeability of vacuum ( $4\pi \times 10^{-7} \text{H}\cdot\text{m}^{-1}$ ),  $H$  is the applied field (in  $\text{A}\cdot\text{m}^{-1}$ ) and  $k_B$  is the Boltzmann constant,  $1.38 \times 10^{-23} \text{J}\cdot\text{K}^{-1}$ . As to model the experimental magnetic data, we have used the Langevin equation weighted by a lognormal function (equation 1).

The experimental curves at high and medium magnetic field ranges are fitted with 1 Langevin equation weighted by log-normal distribution.

At low magnetic field range, the experimental curve are fitted with the sum of 2 Langevin equations weighted by log-normal distribution and corresponding to separate contributions.

The second derivative of the magnetization fit at high and medium magnetic field ranges is compared with the MIAplex® signature (Figure S5).

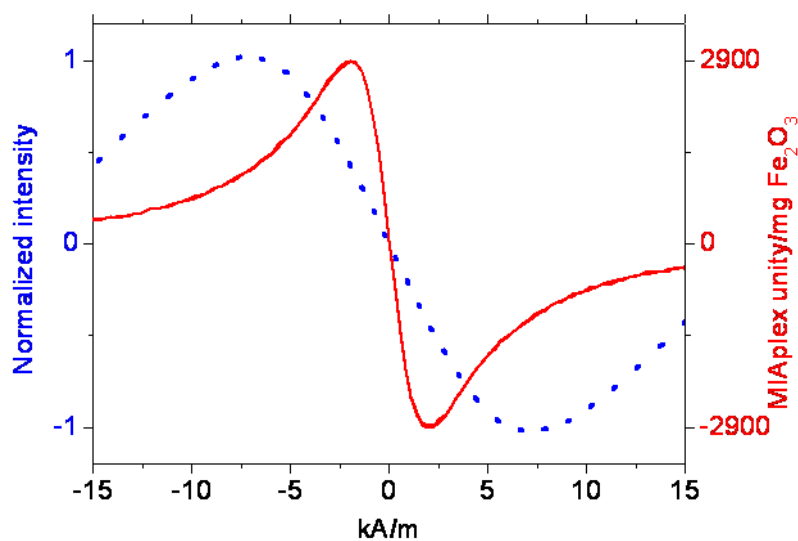

**Figure S6: Second derivative of the magnetization fit at high and medium magnetic field range (dotted line) superposed with the MIAplex® signal (solid line).**

The second derivative of the high and medium magnetic field magnetization fit presents a peak-to-peak line width in field  $\Delta H_{\text{pp}} = 14.4 \pm 0.2 \text{ kA}\cdot\text{m}^{-1}$  which is about 3.7 times bigger than the MIAplex® signature ( $\Delta H_{\text{pp}} = 3.9 \pm 0.1 \text{ kA}\cdot\text{m}^{-1}$ ).

1. Lalatonne, Y. et al. Bis-phosphonates-ultra small superparamagnetic iron oxide nanoparticles: a platform towards diagnosis and therapy. *Chemical Communications*, 2553-2555 (2008).
2. Caizer, C. Saturation magnetization of  $[\gamma]\text{-Fe}_2\text{O}_3$  nanoparticles dispersed in a silica matrix. *Physica B: Condensed Matter* **327**, 27-33 (2003).
3. Millan, A. et al. Surface effects in maghemite nanoparticles. *Journal of Magnetism and Magnetic Materials* **312**, L5-L9 (2007).
4. du Trémolet de Lacheisserie, E. *Magnétisme Fondements Vol. I.* (Grenoble Science, Grenoble; 2000).
